# Supplementary material for: Membrane targeting enhances muramyl dipeptide binding to NOD2 and Arf6–GTPase in mammalian cells
Source: Royal Society of Chemistry journal article supplement (doi:10.1039/d2cc01903e), 2022-01-01
Supplement: d2cc01903e1.pdf [file d2cc01903e1.pdf]

## Supporting Information

### Membrane Targeting enhances muramyl dipeptide binding to NOD2 and Arf6-GTPase in mammalian cells

Charles W. Hespen<sup>1</sup>, Xiaohui Zhao<sup>2</sup> and Howard C. Hang<sup>2\*</sup>

1. *The Rockefeller University, 1230 York Ave, New York, NY, 10065*

2. *Scripps Research, 10550 N. Torrey Pines Rd., La Jolla, CA, 92037*

\* Correspondence: hhang@scripps.edu

#### Table of Contents

|             |                         |          |
|-------------|-------------------------|----------|
| <b>I.</b>   | Experimental Procedures | <b>1</b> |
| <b>II.</b>  | Supplementary Figures   | <b>4</b> |
| <b>III.</b> | References              | <b>4</b> |

#### I. Experimental Procedures

**Cell lines, reagents, and antibodies.** Human embryonic kidney 293T (HEK293T) cell line was obtained from the American Type Culture Collection (ATCC). Cells were cultured in Dulbecco's Modified Eagle Medium (DMEM) (Thermo Fisher) with glucose, L-glutamine, and sodium pyruvate, which was supplemented with 10% final concentration fetal bovine serum (VWR) referred to as complete DMEM. Transient transfections were performed with Lipofectamine 2000 reagent diluted in Opti-MEM reduced serum media (Thermo Fisher). Luciferase reporter assays were performed with the Dual-Luciferase Reporter Assay System (Promega). Muramyl dipeptide (MDP), L18-MDP, and M-triDAP were purchased from Invivogen. GlcNAc-MDP and GlcNAc-MTP were synthesized as previously reported.<sup>1</sup> All SDS-PAGE was performed with Criterion TGX Stain-Free precast 4-20% gels with either 18 or 26 wells (Bio-Rad). All gels and western blots were imaged using ChemiDoc XRS System (Bio-Rad). Immunoprecipitations were performed with EZview Red Anti-HA affinity gel (Millipore Sigma). Anti-HA-peroxidase conjugated antibody (3F10) was purchased from Millipore Sigma (12013819001). Arf6-specific polyclonal antibody was purchased from Proteintech (20225-1-AP). Amersham ECL rabbit-IgG, HRP-linked whole antibody was purchased from Cytiva (NA934).

**Plasmids and molecular biology.** The plasmids pDSHA-Arf6-Myc, pCMV-HA-NOD2, PRDII-4x-luc, and pRL-TK were used as previously reported.<sup>1,2</sup> Site-directed mutagenesis was performed using the Q5 Site-Directed Mutagenesis Kit (New England Biolabs) using primers in Supplementary Table 1. Mutants not listed in the table were designed in a previous study.<sup>2</sup>

| Plasmid        | Mutant                                           | Primers                                                                |
|----------------|--------------------------------------------------|------------------------------------------------------------------------|
| pDSHA-Arf6-myc | N-term Swap                                      | TTCGCCAACCTCTTCGGGAACAAGGAAATG<br>GATGTTCCCATGGTTCTATCTCCTTCTAAG       |
|                | K3R                                              | AACCATGGGGCGGGTGCTATCCA<br>CTATCTCCTTCTAAGCCTG                         |
|                | S38I                                             | GCTGGGCCAGATTGTGACCACCA<br>TTCAACTTGTACAGGATTGTTG                      |
|                | T44N                                             | CACCATTCCCAATGTGGGTTTCAAC<br>GTCACCGACTGGCCCAGC                        |
|                | F47A                                             | CACTGTGGGTGCCAACGTGGAGAC<br>GGAATGGTGGTCACCGAC                         |
|                | T53E                                             | GGAGACGGTGGAGTACAAAAATGTCAAGTTC<br>ACGTTGAAACCCACAGT                   |
|                | K58S                                             | CAAAAATGTCTCGTTCAACGTATGGGATGTG<br>TAAGTCACCGTCTCCACG                  |
|                | N60T                                             | TGTCAAGTTCACCGTATGGGATG<br>TTTTTGTAAGTCACCGTC                          |
|                | W62A                                             | GTTCAACGTAGCGGATGTGGGCG<br>TTGACATTTTTGTAAGTCAC                        |
|                | Y77A                                             | CTGGCGGCATGCCTACACTGGGAC<br>AGCGGCCGGATCTTGTC                          |
|                | TG79QN                                           | GCATTACTACCAGAATACCCAAGGTCTCATCTTCGTAGTGGACTGCGC<br>CGCCAGAGCGGCCGGATC |
| CA90SN         | CGTAGTGGACTCCAATGACCGCGACC<br>AAGATGAGACCTTGGGTC |                                                                        |
| pCMV-HA-NOD2   | C395S                                            | TGAACGCCACTCCTCCCCGACCG<br>CGATCCGTGAACCTGAACTTGAACCTCG                |
|                | C1033S                                           | CAAGCTCGGCTCCAGGGACACCA<br>TCAACCTCCTCTAGAGAGAAAGTGTTTC                |

**Co-immunoprecipitation of HA-NOD2 and Arf6.**  $0.15 \times 10^6$  HEK293T cells per well were seeded for 16-20 hours in 12-well plates in complete DMEM. Cells were transfected the following day with 1.0  $\mu$ g HA-NOD2 plasmid, 1.0  $\mu$ g Arf6-myc plasmid, and 4.0  $\mu$ L Lipofectamine 2000 per well. MDP or other NOD2 agonists were added 6 hours post-transfection and incubated overnight. Afterward, cells were harvested and lysed in 0.25

mL Brij Lysis buffer (50 mM HEPES pH 7.4, 150 mM NaCl, 0.2% Brij 97) on ice. Lysates were cleared at 15,000 xg for 10 min at 4 °C. 10 µL of clarified lysate were set aside to be run on a separate SDS-PAGE gel. 200 µL of clarified lysate were gently mixed with 10 µL of anti-HA immunoprecipitation beads for 1 hour at 4 °C and then washed three times with 0.5 mL ice-cold RIPA buffer (50 mM HEPES pH7.4, 150 mM NaCl, 1.0% NP-40, 0.5% sodium deoxycholate, and 0.1% SDS). 10 µL of 4x Laemmli sample buffer was added to the beads and boiled for 5 min to elute protein. Samples were then run on SDS-PAGE gel. Stain-Free imaging was used to view total protein. The gel was then transferred (50 mM Tris, 40 mM glycine, 20% methanol, Bio-Rad Trans-Blot Turbo Semi-Dry Cell, 25 V, 30 min) onto a transfer membrane (Immobilon-P<sup>SQ</sup> 0.2 µm pore size). The membrane was blocked in 5% nonfat milk in TBST (0.1% Tween-20 in Tris buffered saline) for 1 hour at room temperature. The membrane was incubated in anti-Arf6 (1:300) in 5% milk in TBST overnight at 4 °C with gentle agitation followed by washing with TBST (3 x 10 min). Blots were then treated with anti-rabbit-HRP conjugated secondary antibody (1:10000) in TBST for 1 hour, washed with TBST (3 x 10 min), and visualized with Clarity Western ECL Substrate (Bio-Rad). After imaging, the antibodies were stripped by submerging the membrane in Restore Western Blot Stripping Buffer for 30 min. The membrane was then washed 3 times in TBST, loaded into a Snap i.d. 2.0 cassette (Millipore Sigma), rapidly blocked with 0.5 % milk in PBST, blotted with anti-HA-HRP conjugated antibody (1:1000) for 10 min and washed 4 x with PBST using the Snap i.d platform. The blot was again visualized for HA-NOD2. The area of Co-immunoprecipitated Arf6 bands were measured using Image Lab software (Bio-rad). Boxes were drawn around Arf6 bands and around 3 random empty background areas on the blot image. Background was subtracted from the Arf6 band intensity and values were normalized to conditions with NOD2-WT, Arf6-WT and MDP. Values were averaged in triplicate from independent transfections. P-values were calculated with unpaired students t-test using Prism 9 software.

**NOD2 dependent NF- $\kappa$ B luciferase reporter assays.**  $0.15 \times 10^6$  HEK 293T cells per well were seeded overnight in 12-well plates with complete DMEM. The following day, cells were transfected with plasmids

expressing firefly luciferase (PRDII-4x-luc 50 ng/well), Renilla luciferase (pRL-TK 50 ng/well), HA-NOD2 (50 ng/well), and 2.5  $\mu$ L/well Lipofectamine 2000. After 6 hours, media was aspirated out and replaced with Opti-MEM containing MDP or L18-MDP. Cells were incubated for 2 hours. Cells were harvested, lysed and assayed for luciferase activity using Dual-Luciferase reporter kit.

## II. Supplementary Figures

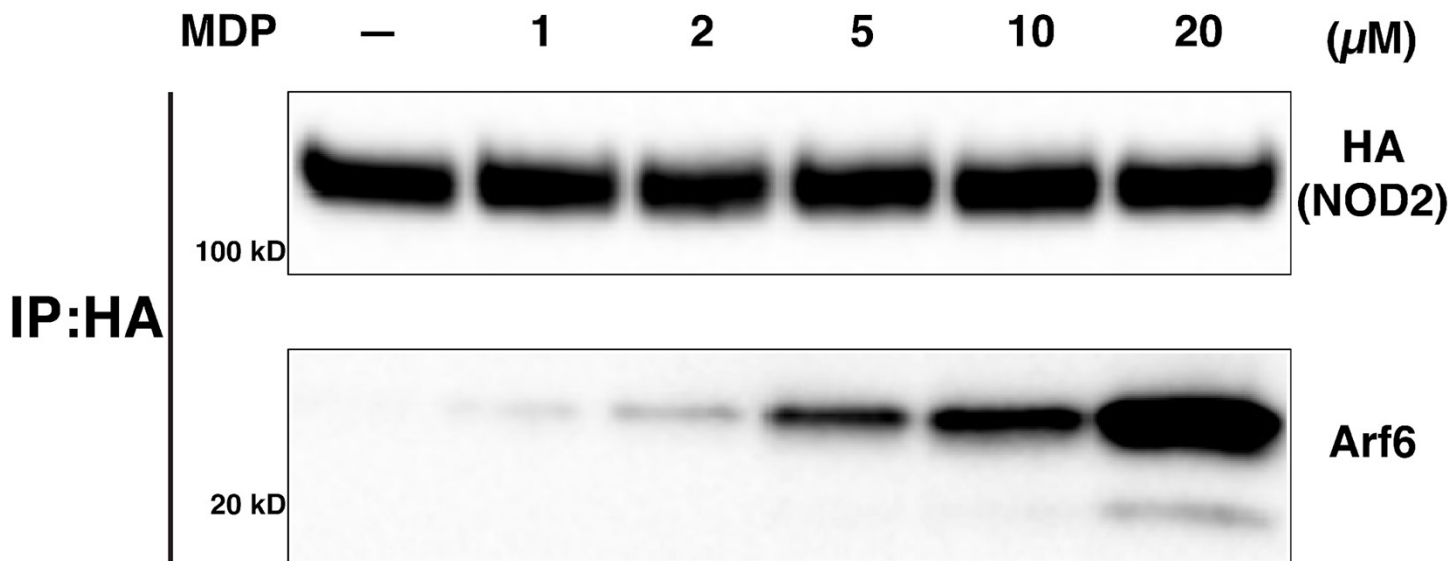

**Figure S1.** IP:HA of HA-NOD2 co-transfected with Arf6-myc. Arf6 co-IP increases with concentration of MDP.

## III. References

- 1 B. Kim, Y.-C. Wang, C. W. Hespen, J. Espinosa, J. Salje, K. J. Rangan, D. A. Oren, J. Y. Kang, V. A. Pedicord and H. C. Hang, *Cell Microbiol.*, DOI:10.7554/elife.45343.
- 2 Y.-C. Wang, N. P. Westcott, M. E. Griffin and H. C. Hang, *ACS Chemical Biology*, 2019, 14, acschembio.8b01038-414.
